# Supplementary material
Source: publisher site journal article supplement (https://www.dovepress.com/article/435782)
Supplement: Supplementary file 1 [file get_supplementary_file.php]

**Supplementary Table 1 Migraine Preventive Medication Classification as per AAN 2013 Guidelines**

| **AAN Drug Class** | **Drug Category** | **Examples** |
| --- | --- | --- |
| Level A Drugs (established as effective) | Antiepileptic drugs | Divalproex sodium |
| Sodium valproate |
| Topiramate |
| Beta-blockers | Metoprolol |
| Propranolol |
| Timolol |
| Triptans | Frovatriptan |
| Level B Drugs (probably effective) | Antidepressants | Amitriptyline |
| Venlafaxine |
| Beta-blockers | Atenolol |
| Nadolol |
| Triptans | Naratriptan |
| Zolmitriptan |
| Level C Drugs (possibly effective) | Angiotensin-converting enzyme inhibitors | Lisinopril |
| Angiotensin receptor blockers | Candesartan |
| Alpha-Agonists | Clonidine |
| Guanfacine |
| Antiepileptic drugs | Carbamazepine |
| Beta-blockers | Nebivolol |
| Pindolol |
| Level U Drugs (Inadequate or conflicting data to support or refute medication use) | Anti-epileptic drugs | Gabapentin |
| Antidepressants | Fluoxetine |
| Fluvoxamine |
| Protriptyline |
| Antithrombotics | Acenocoumarol |
| Coumadin |
| Picotamide |
| Beta-blockers | Bisoprolol |
| Calcium-channel blockers | Nicardipine |
| Nifedipine |
| Nimodipine |
| Verapamil |
|  | Acetazolamide |
|  | Cyclandelate |
| Other (not classified by AAN) |  | OnabotulinumtoxinA (Botox) |
